# Supplementary material
Source: Springer Nature journal article supplement (https://www.springermedizin.de/resource/supplementary/12879_2008_832_MOESM6_ESM.pdf/9449886)
Supplement: MOESM6 [file 9449886]

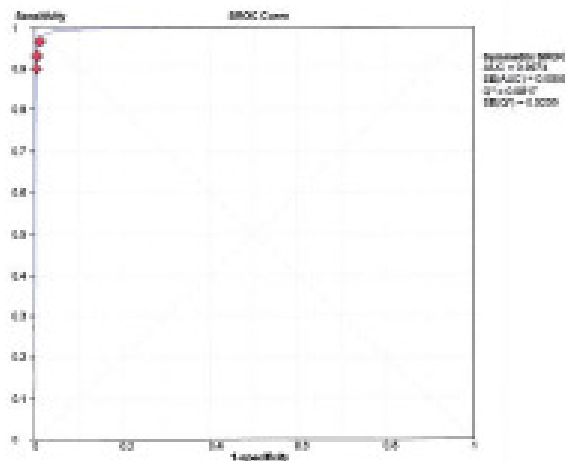

**Analysis Options:**  
 Add 10 to all cells of the table with zero  
 Plot CI\*  
 Symmetric ROC curve (Best using Exact Model (Weighted regression) (Cross Validation))  
 Default format: report AUC, CI\*

6a) Nitrate Reductase Assay

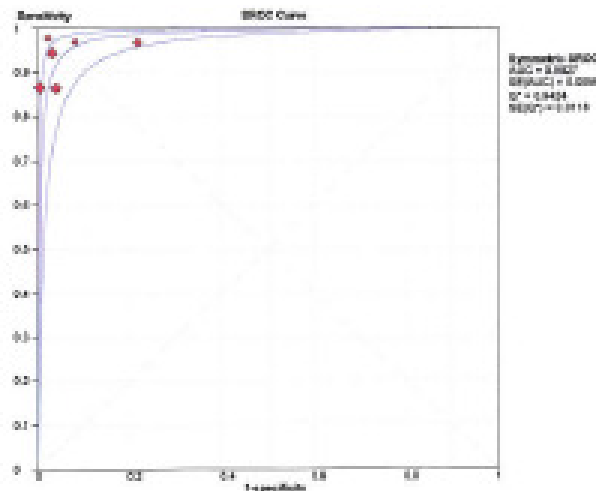

6b) MODS

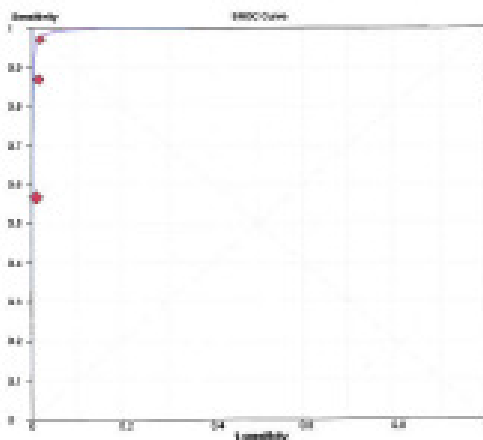

**Analysis Options:**  
 Add 10 to all cells of the table with zero  
 Plot CI\*  
 Symmetric ROC curve (Best using Exact Model (Weighted regression) (Cross Validation))  
 Default format: report AUC, CI\*

6c) Genotype<sup>®</sup> MTBDR

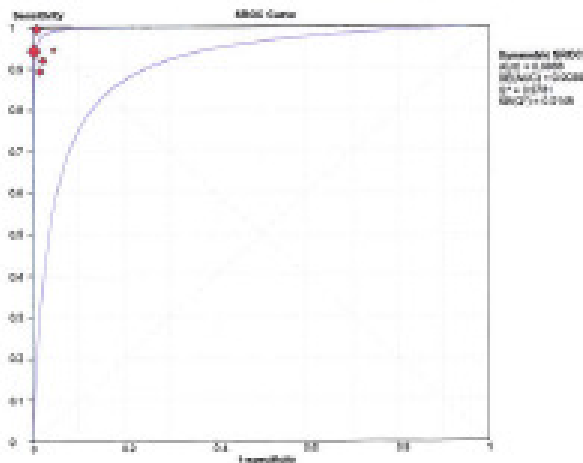

**Analysis Options:**  
 Add 10 to all cells of the table with zero  
 Plot CI\*  
 Symmetric ROC curve (Best using Exact Model (Weighted regression) (Cross Validation))  
 Default format: report AUC, CI\*

6d) Genotype<sup>®</sup> MTBDRplus
